# Supplementary material for: A community-based intervention to increase participation in cervical cancer screening among immigrants in Norway
Source: Springer Nature journal article supplement (doi:10.1186/s12874-019-0795-8), 2019-07-12
Supplement: MOESM2 [file 16924726]

# Cervical Cancer Intervention Meeting

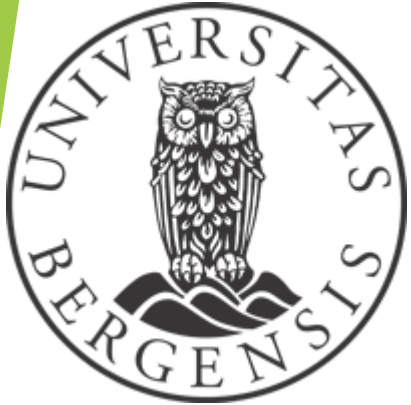

Samera Azeem Qureshi MD, PhD  
Prabhjot Kour MD, MPhil

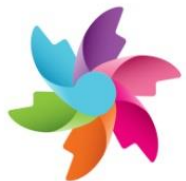

## OUR CERVICAL CANCER PROJECT

### سرویکل کینسر پروجیکٹ

#### Goals

#### مقاصد

- To evaluate the effectiveness of two different community-based strategies to increase the attendance to the cervical cancer screening prevention program.

سرویکل کینسر اسکریننگ پروگرام میں شرکت کو بڑھانے کے لیئے دو مختلف طریقوں کے اثرات کو جانچنا۔

- Effect of the interventions measured quantitatively will be compared to each other

پھر ان دونوں مختلف طریقوں کا آپس میں موازنہ کرنا ہے۔

## CERVICAL CANCER PROJECT

### سرویکل کینسر پروجیکٹ

Bergen:

Target Group: ٹارگٹ  
گروپ

- GPs
- Nurses
- Midwives

Method: طریقہ کار

- Posters
- Post- cards
- Meetings

Oslo:

Target Group: ٹارگٹ گروپ  
Pakistani and Somali women

پاکستانی اور صومالی خواتین

Place: جگہ

Lørenskog  
Bærum  
Asker  
Drammen

Method: طریقہ کار

Information meetings معلوماتی میٹنگ

**Good Health**

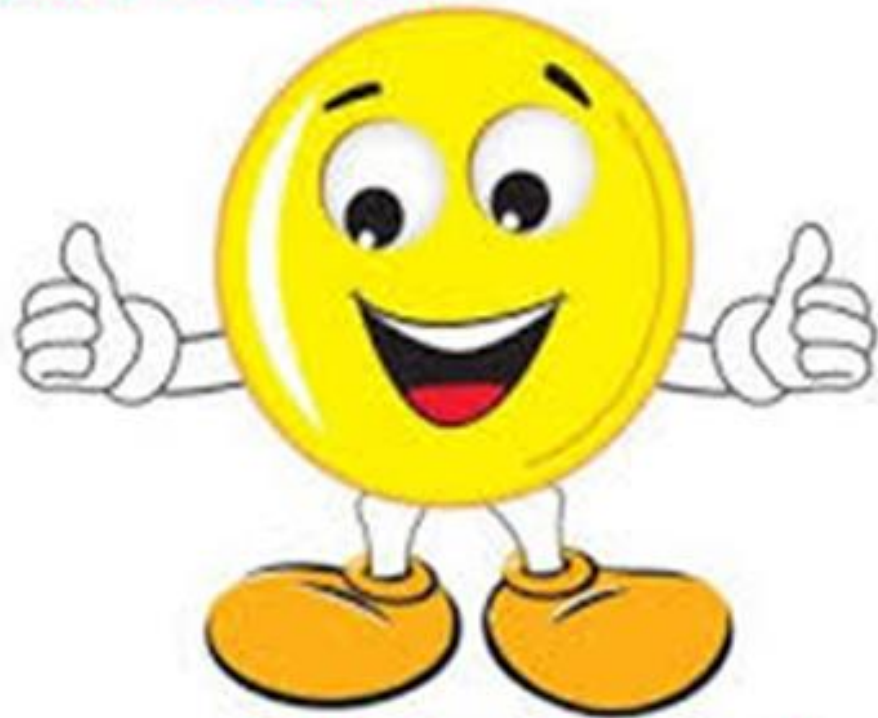

**Makes You Smile**

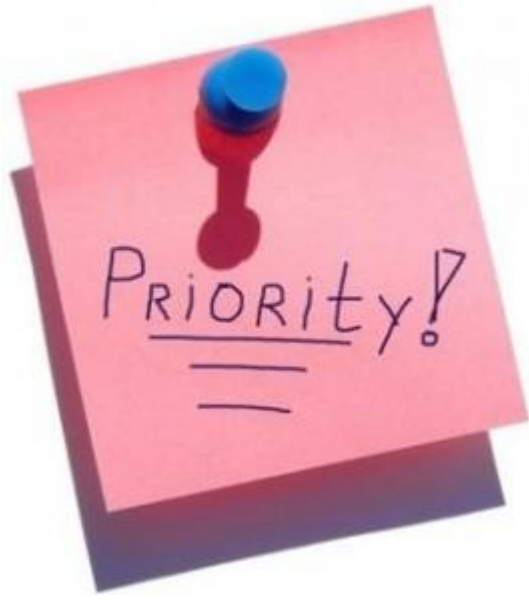

# Health

## صحت

Take good care of your Body

اپنے جسم کا بہتر طریقے سے خیال رکھنا۔

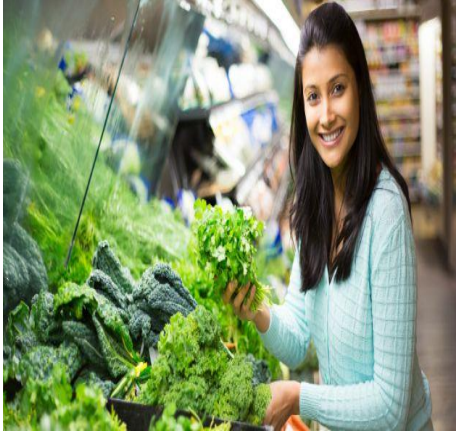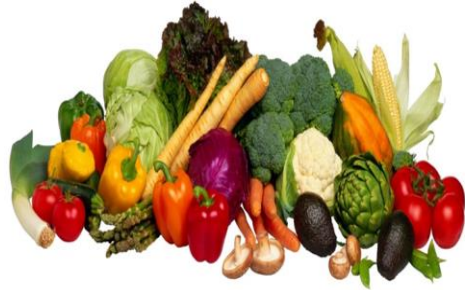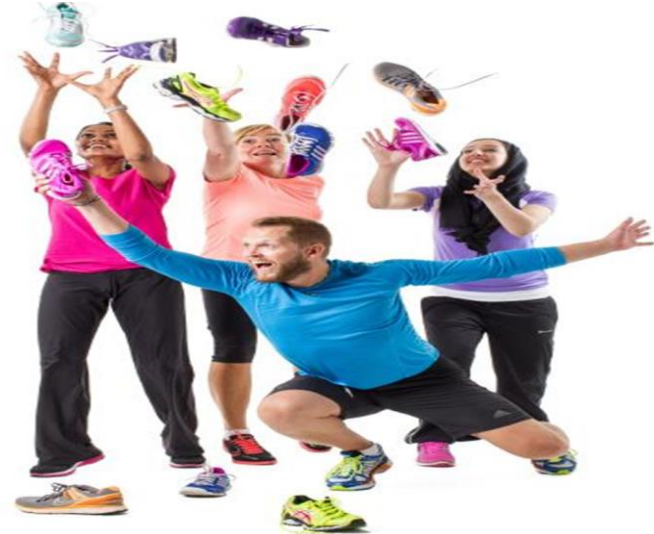

# Healthy Lifestyle

Eat Healthy

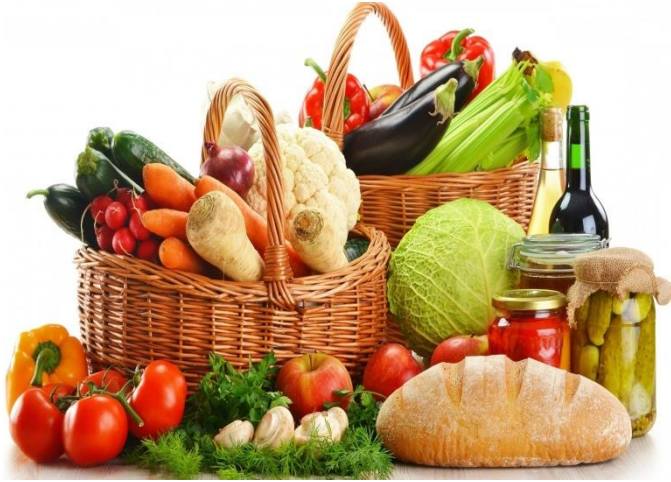

Drink Water

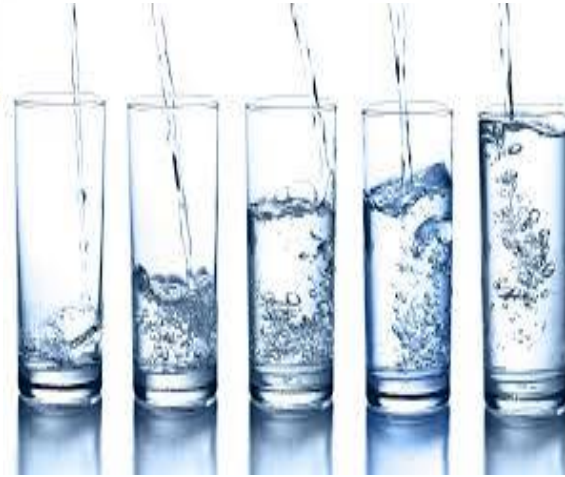

Enough sleep

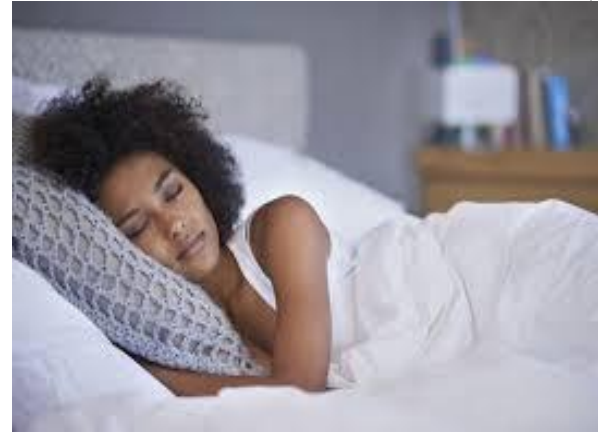

Be Active

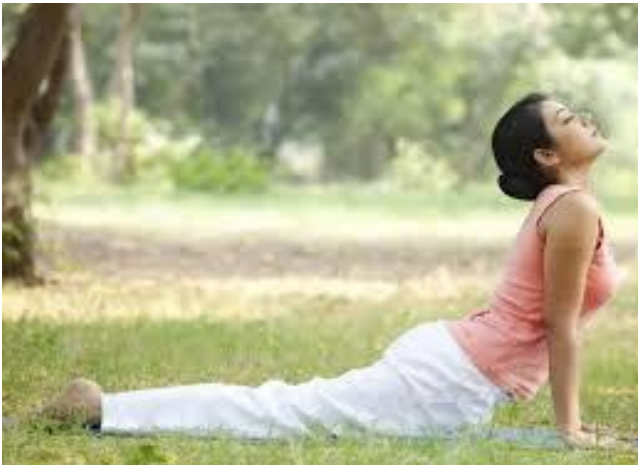

Regular Check-up

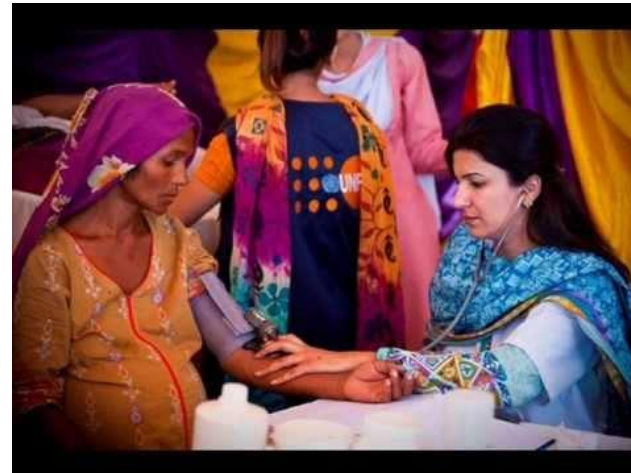

Cancer

كینسر

## Frequently asked questions about cancer?

کینسر کے بارے میں عمومی سوالات؟

Can I have cancer without knowing?

کیا مجھے جانے بغیر کینسر ہو سکتا ہے؟

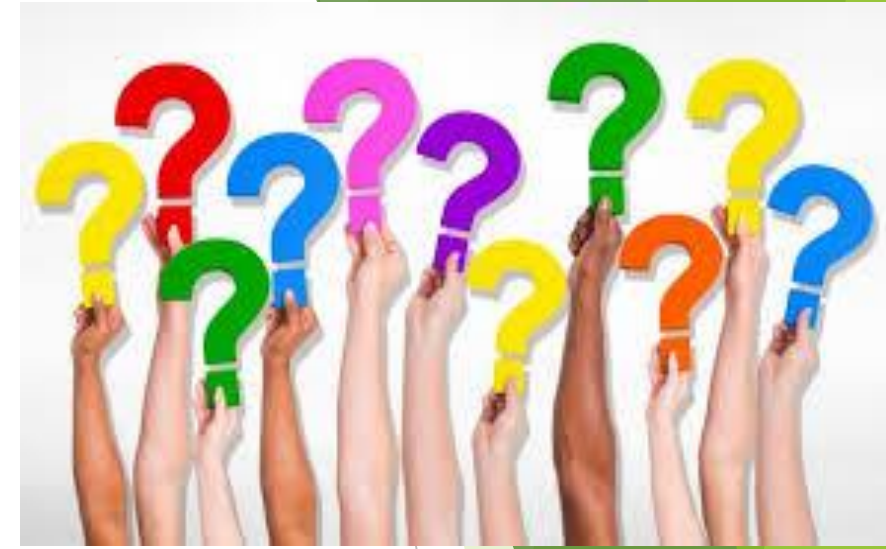

Will I have to take medicines all my life?

کیا مجھے اب ساری عمر دوائیاں استعمال کرنی ہوں گی؟

Is cancer dangerous?

کیا کینسر خطرناک ہوتا ہے؟

Will I be healthy again?

کیا میں تندرست ہو سکتی ہوں؟

Is it contagious?

کیا کینسر چھوت کی بیماری ہے؟



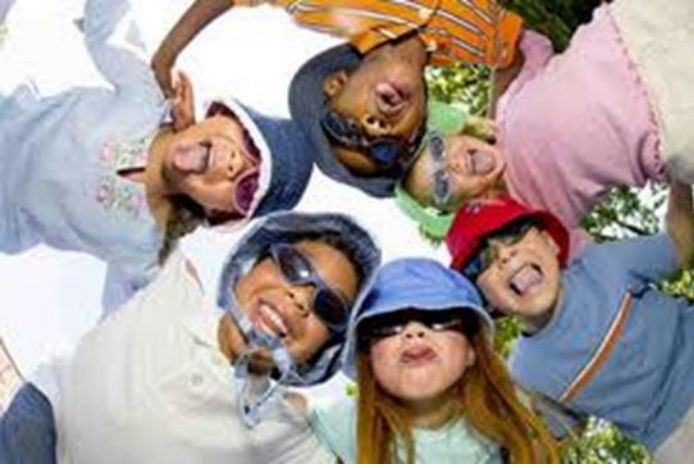

## WHAT IS CERVICAL CANCER?

بچہ دانی کے نچلے حصے کا کینسر کیا ہے؟

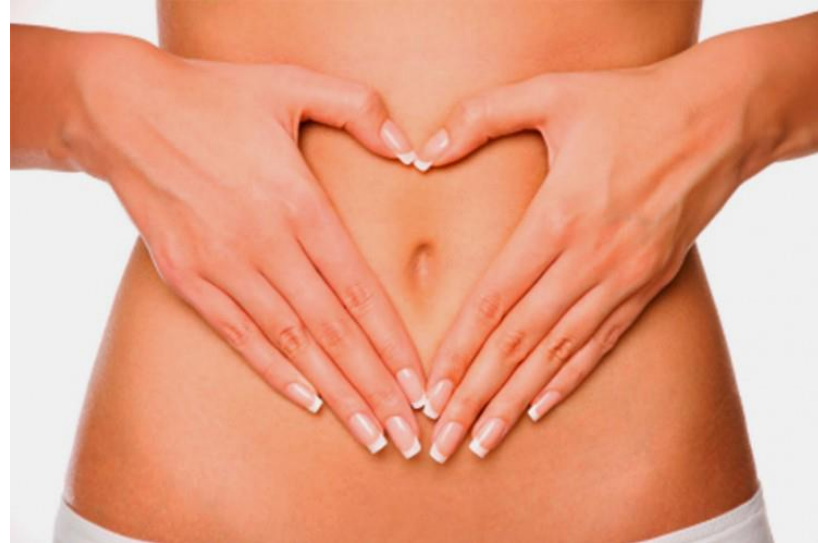

## WHAT IS CERVICAL CANCER?

- Cancer that starts in the CERVIX- the lower part of the uterus that connects to the vagina

بچہ دانی (رحم) کے نچلے حصے کے کینسر کو (سرویکل کینسر) کہتے ہیں۔

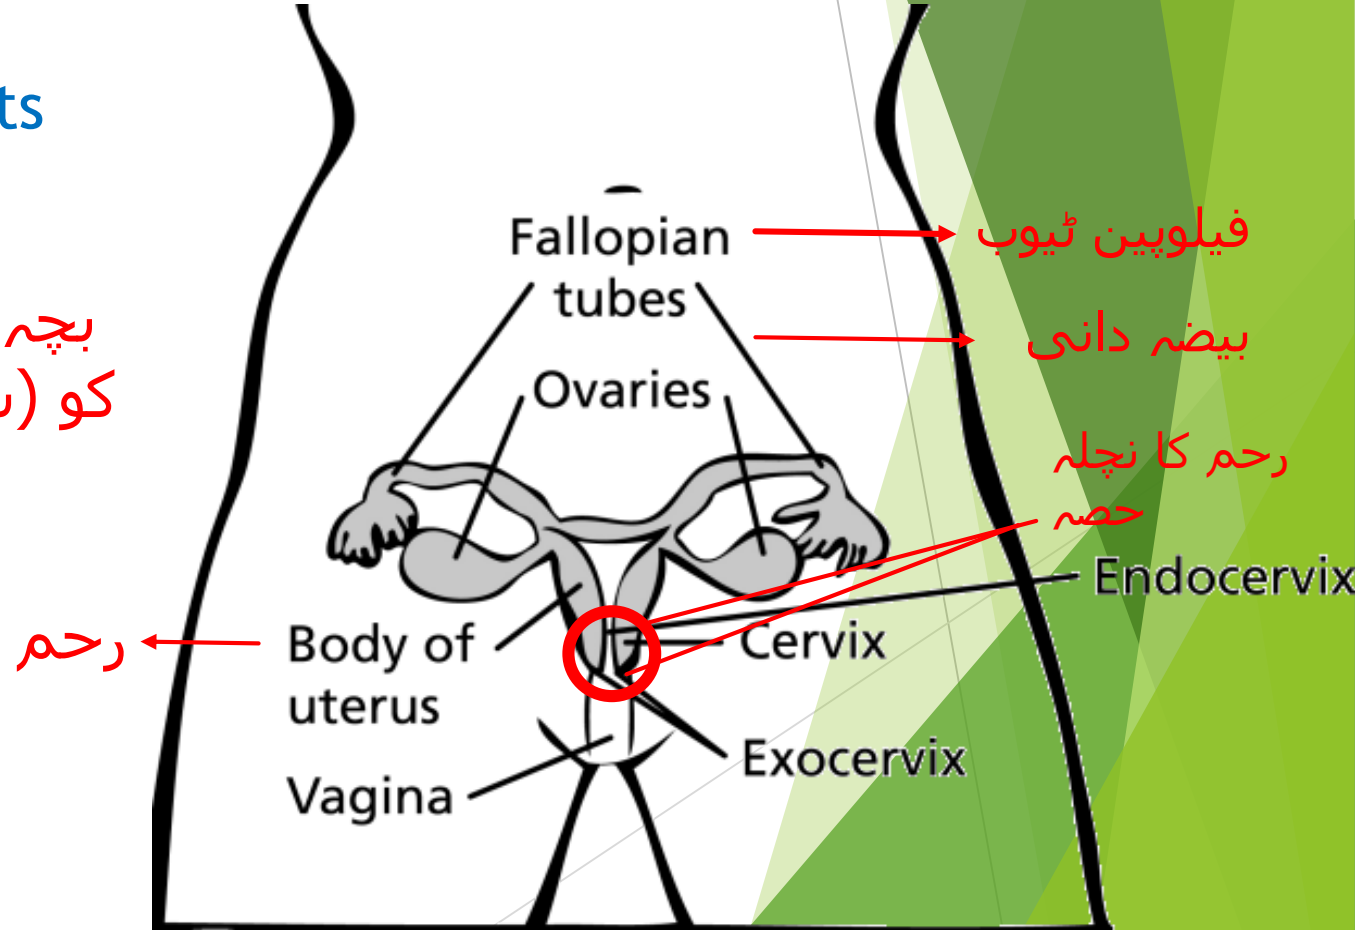

# WHAT IS CERVICAL CANCER?

- Cancer starts when cells in the body begin to grow out of control.  
جسم میں خلیات کے کنٹرول سے باہر اضافہ کو کینسر کہتے ہیں۔ اور یہ جسم کے کسی حصے میں شروع ہو سکتا ہے۔
- Cells in nearly any part of the body can become cancer, and can spread to other areas of the body.  
جسم کے تقریباً کسی بھی حصے کے خلیات کینسر بن سکتے ہیں، اور یہ جسم کے دیگر حصوں تک پھیل سکتا ہے۔

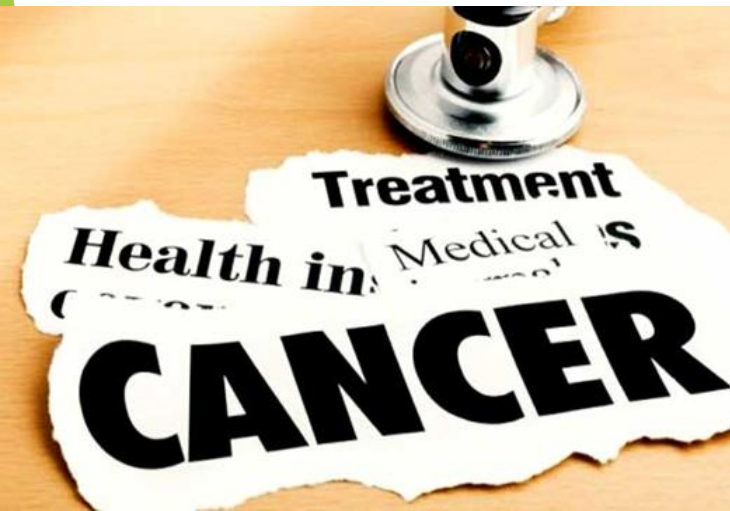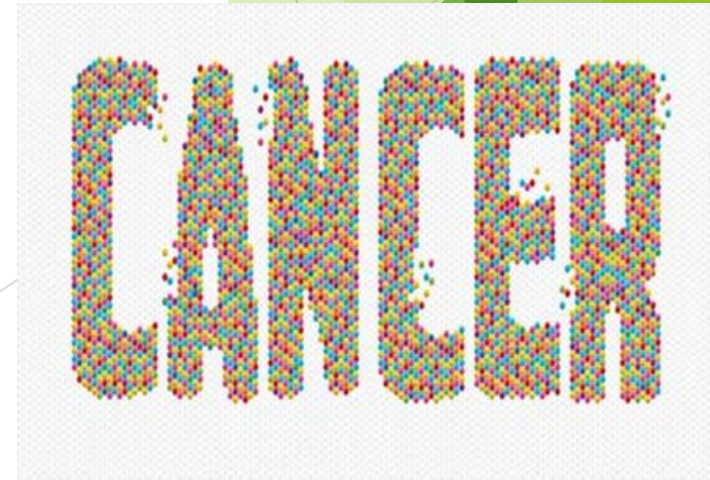

## WHAT IS CERVICAL CANCER?

- Most cervical cancers start in the cells lining the cervix.

ذیادہ تر کینسر رحم کے نچلے حصے کے خلیوں میں شروع ہوتے ہیں۔

- These cells do not suddenly change into cancer. Instead, the normal cells of the cervix first gradually develop pre-cancerous changes that may turn into cancer.

یہ خلیات اچانک کینسر نہیں بنتے، بلکہ ان میں بتدریج تبدیلی آتی ہے جو کے بعد میں کینسر بن جاتی ہے۔

- These changes can be detected by the PAP TEST and treated to prevent cancer from developing.

یہ تبدیلیاں پیپ ٹیسٹ کے ذریعے پتہ چلائی جا سکتی ہیں اور کینسر سے بچا جا سکتا ہے۔

## Causes of Cervical Cancer

### کینسر کی وجوہات

The cause of nearly all cervical cancer is human papilloma virus or HPV.

تقریباً تمام سرویکل کینسر کی وجہ ہیومن پیپیلوما وائرس (ایچ پی وی) ہے۔

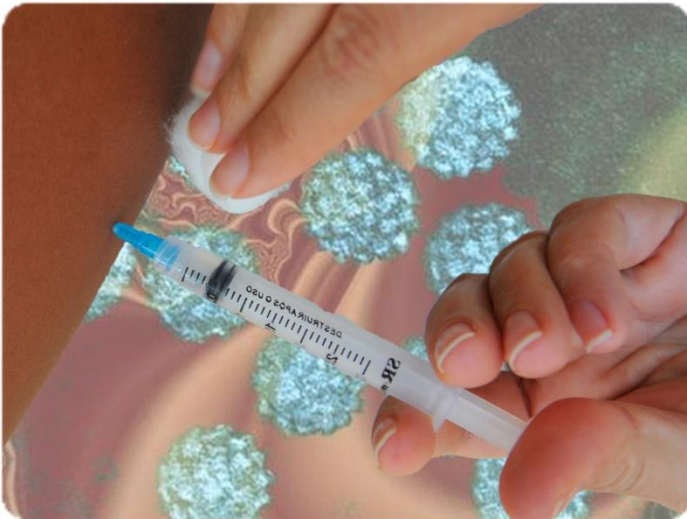

# Risk factors for cervical cancer

## کینسر کے عناصر

- HPV infection

### ایچ پی وی انفیکشن

- Extremely common in women who have ever had sex

یہ انفیکشن ہر اس خاتون کو ہو سکتا ہے جس نے جنسی ملاپ کیا ہو۔

- Having an HPV infection does NOT mean you WILL get cervical cancer!

ایچ پی وی انفیکشن کا مطلب یہ نہیں ہے کہ آپ کو کینسر ہو سکتا ہے۔

- In most cases, HPV infection will clear on its own.

زیادہ تر یہ خود ہی ٹھیک ہو جاتا ہے۔

- Only women with persistent HPV (where the virus does not go away) are at risk for cervical cancer.

صرف وہ خواتین جن کو مسلسل انفیکشن کی شکایت رہتی ہو کو خطرہ زیادہ ہے۔

# Risk factors for cervical cancer

## کینسر کے عناصر

- Not getting screened- is the biggest risk factor.

اسکرین نہ کروانا۔ سب سے بڑا عنصر ہے۔

- Immunosuppressed

قوت مدافعت کا کم ہونا مثلاً

- HIV
- Diabetic
- Other

# Cervical cancer screening

## سرویکل کینسر اسکریننگ

- Screening is testing to find cancer, or other diseases, early in people who have no symptoms.

اسکریننگ سے کینسر اور دوسری بیماریوں کا پتہ چلایا جا سکتا ہے۔

- Screening can help find cancers when they are small and have not spread - when they have a better chance of being cured.

اسکریننگ سے کینسر کو پھیلنے سے پہلے روکا جا سکتا ہے۔ جب کے علاج ممکن ہوتا ہے۔



# Cervical cancer screening

## سرویکل کینسر اسکریننگ

Cervical cancer screening is done with

سرویکل کینسر اسکریننگ دو طریقوں سے ہو سکتی ہے۔

- Pap Test

پیپ ٹیسٹ

- HPV test

ایچ پی وی ٹیسٹ

# Cervical cancer screening

## سرویکل کینسر اسکریننگ

- What is a Pap test?

پیپ ٹیسٹ کیا ہے؟

- A test which collects cells from the surface of the cervix to check for any abnormal cells

اس ٹیسٹ کے ذریعے سروکس کے خلیوں کو اکٹھا کر کے ان کا معائنہ کیا جاتا ہے۔ تاکہ بیمار خلیوں کا پتہ چلایا جا سکے۔

## Cervical cancer screening

### سرویکل کینسر اسکریننگ

- Abnormal cells can be removed or treated before cervical cancer develops.

بیمار خلیوں کا کینسر بننے سے پہلے علاج ممکن ہے۔

- When cancer is detected early, it is easier to treat.

کینسر کی جلد تشخیص علاج کو ممکن کر دیتی ہے۔

- A pelvic exam is NOT a Pap test; ONLY a Pap test can find early cervical cancer or pre- cancer.

نچلے حصے کا معائنہ پیپ ٹیسٹ نہیں ہوتا۔ صرف پیپ ٹیسٹ کے ذریعے کینسر کا پتہ چلایا جا سکتا ہے۔

# Pap Test

پپ ٹیسٹ

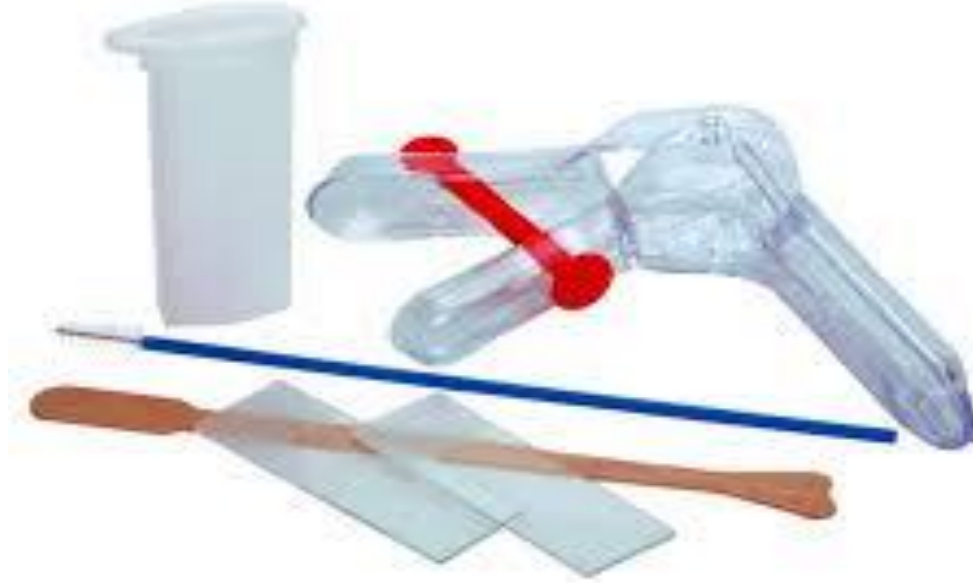

Instruments for pap test

پپ ٹیسٹ کے اوزار

# Pap Test Video

پپ ٹیسٹ

[Video](#)

# Pap Test

## پپ ٹیسٹ

- Pap tests are very accurate and regular

پپ ٹیسٹ بالکل صحیح رزلٹ دیتا ہے۔

- Pap screenings reduce cervical cancer rates and mortality by 80%.

پپ ٹیسٹ سروریکل کینسر اور اس کی وجہ سے اموات کو اسی فیصد تک کم کر دیتا ہے۔

# Norwegian screening Guidelines

## نارویجن اسکریننگ گائیڈ لائنز

- All women between 25- 69 years every 3 years

69- 25 سال کی تمام خواتین کو ہر تین سال بعد ٹیسٹ کروانا چاہیئے۔

- The Cancer Registry, which runs NCCSP, sends letters to women between 25 and 69 years old who have a test taken less often than every third year

کینسر رجسٹری جو کہ نیشنل سرویکل کینسر اسکریننگ پروگرام چلاتا ہے۔ اس عمر کی تمام خواتین جو کے تین سال بعد بھی ٹیسٹ نہیں کرواتی کو یاد دہانی کے خطوط ارسال کرتا ہے۔

# Norwegian screening Guidelines

## نارویجن اسکریننگ گائیڈ لائینز

### How to take the test

#### ٹیسٹ کے لیئے ڈاکٹر سے رابطے کا طریقہ

- You can make an appointment at your General practitioner (GP).  
اپنے Fastlege سے ٹائم لیں۔
- The doctor does a gynaecological examination and takes samples from the cervix.  
وہ آپ کے نچلے حصے کے معائنہ کے بعد Sample لے گی۔

### Payment or fee

#### فیس کی ادائیگی

- General practitioners NOK- 136  
Fastlege کی فیس NOK 136
- Test equipment- NOK 54  
اوزار NOK 54
- Ask what the fee is when you make an appointment.  
ڈاکٹر سے رابطہ کے وقت فیس کا بھی پوچھ لیں۔



Make an Appointment Today!

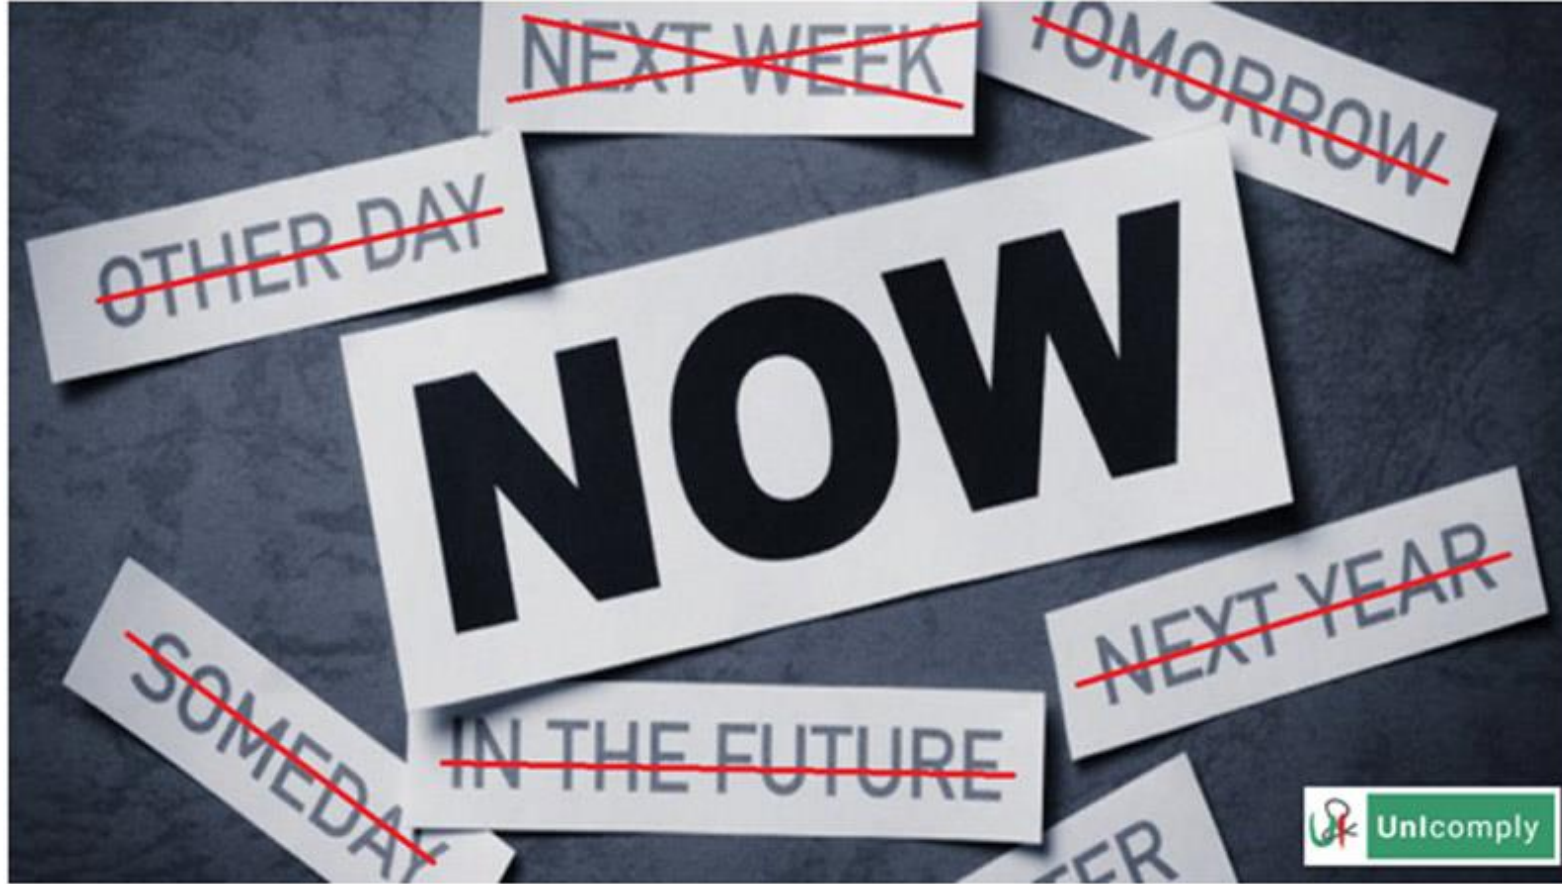

ابھی اپنے ڈاکٹر سے رابطہ کریں!

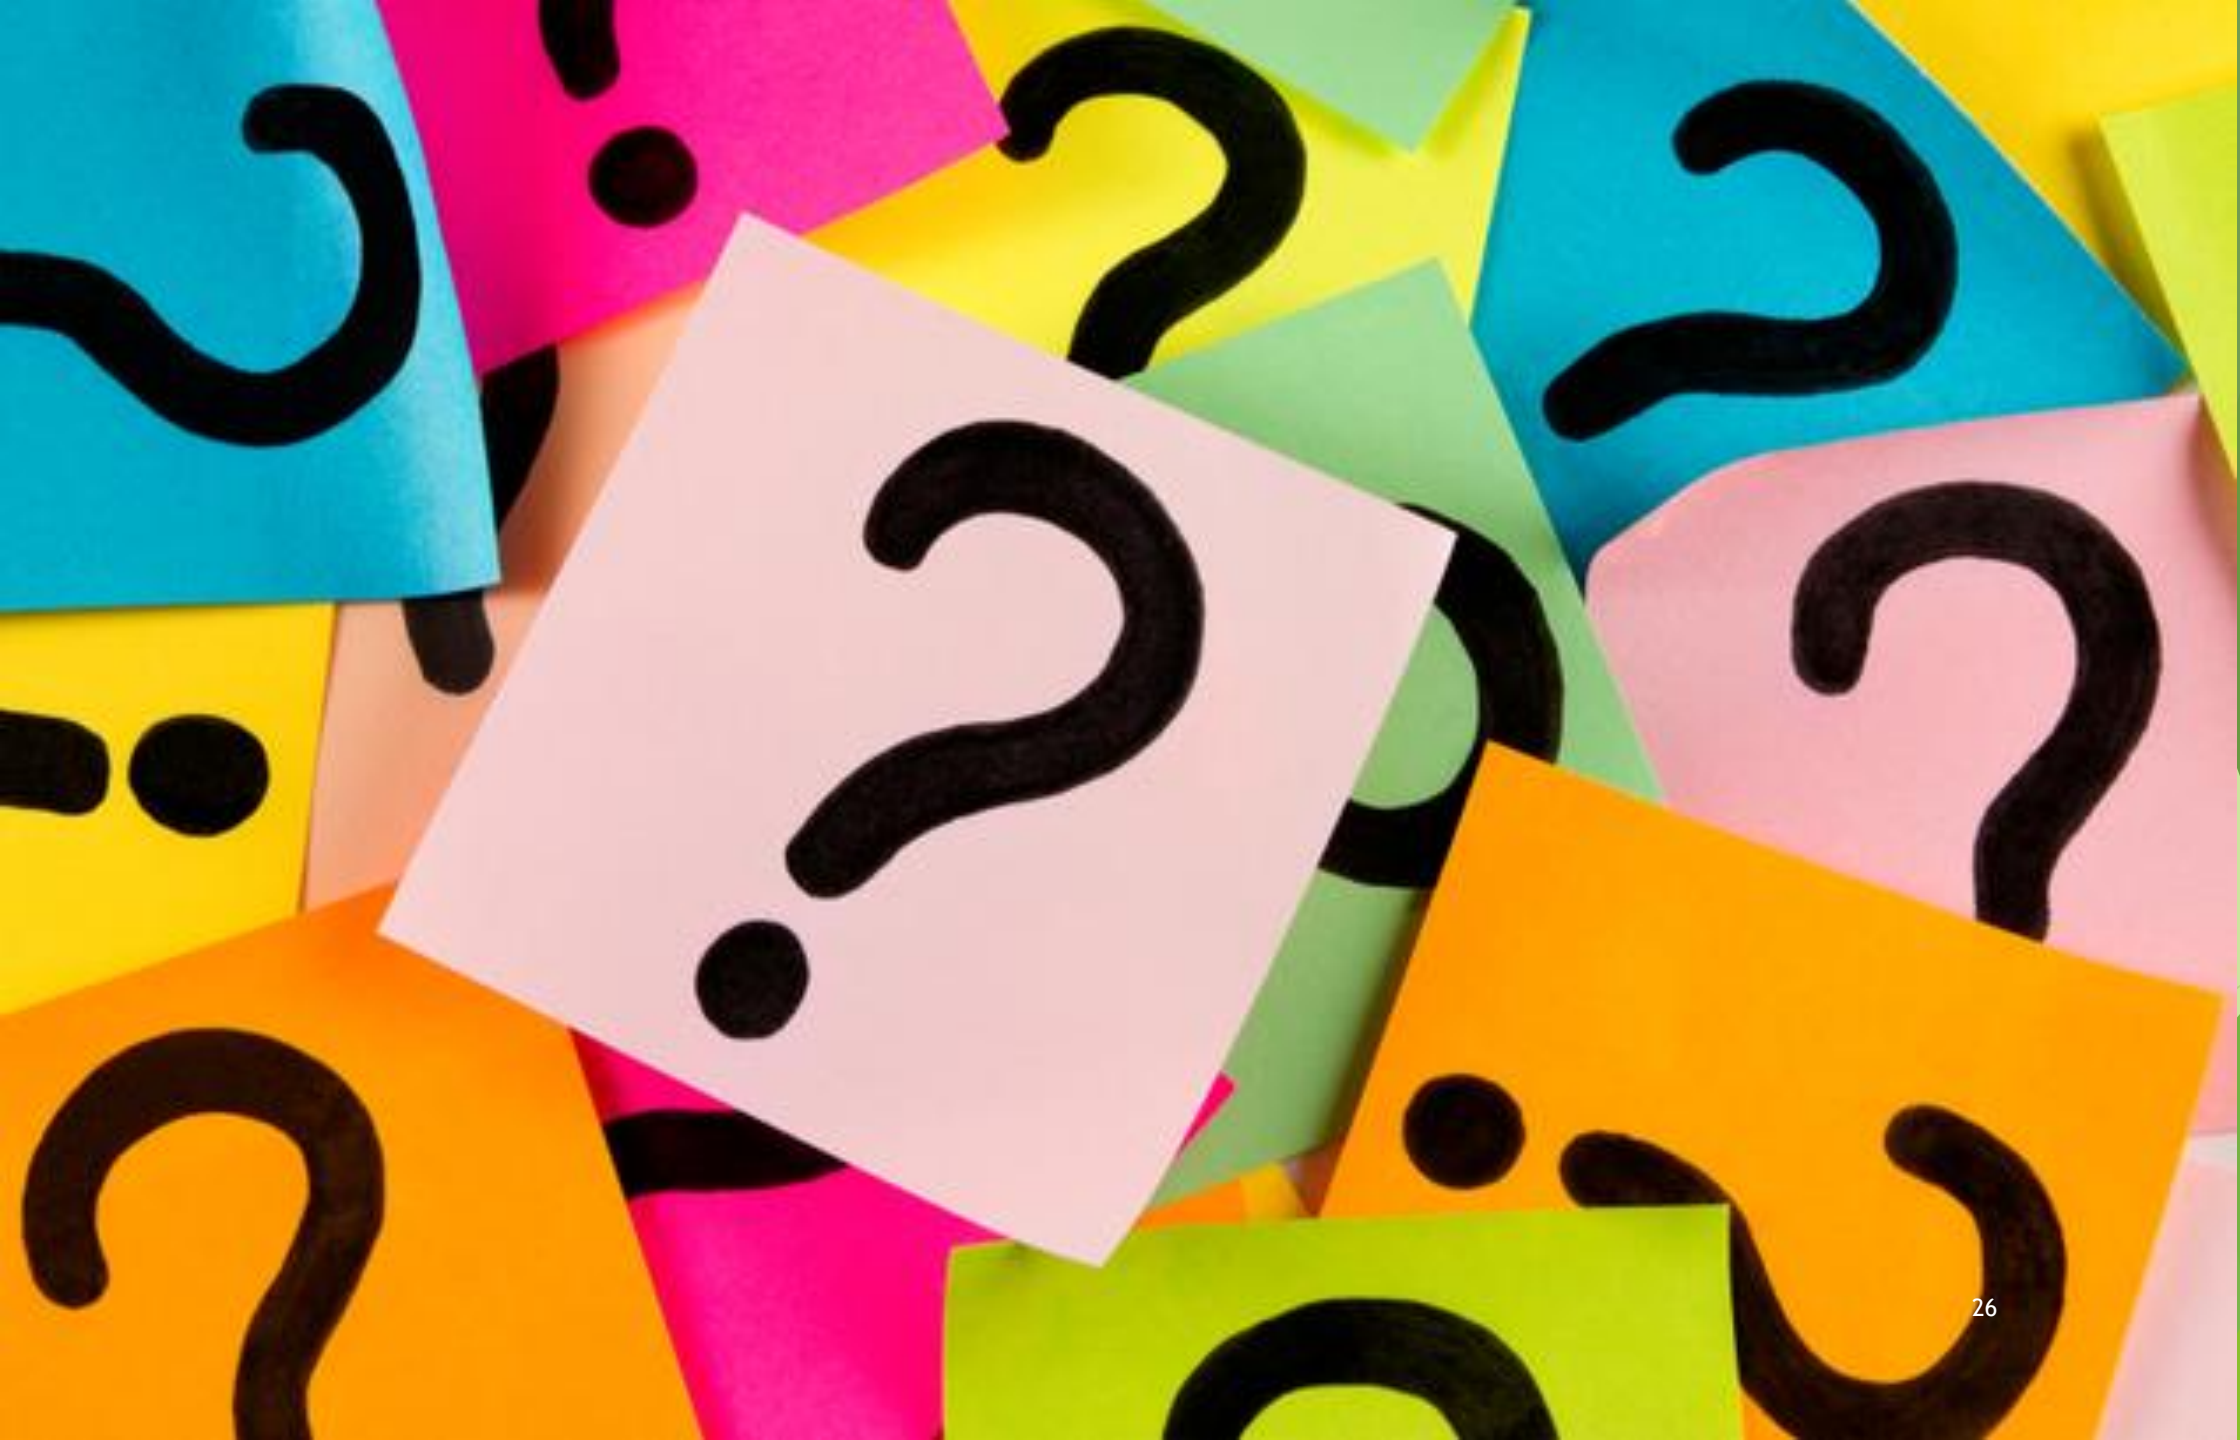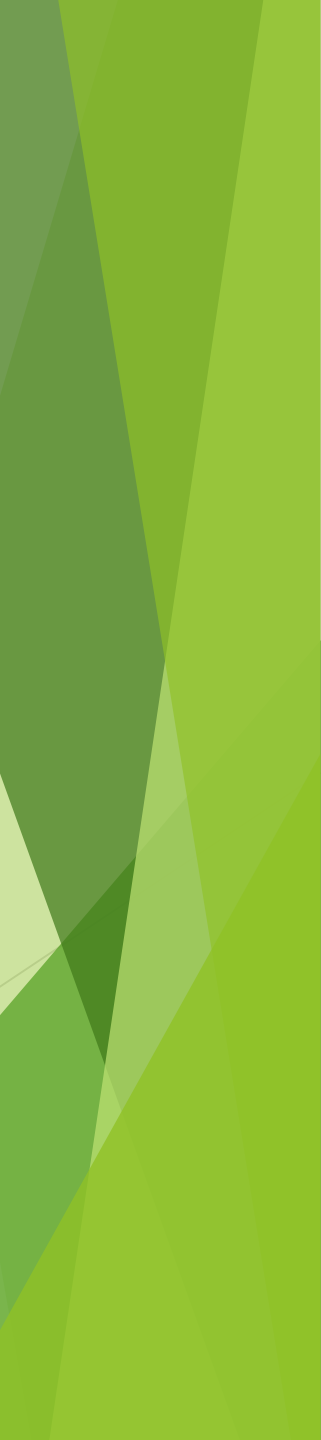

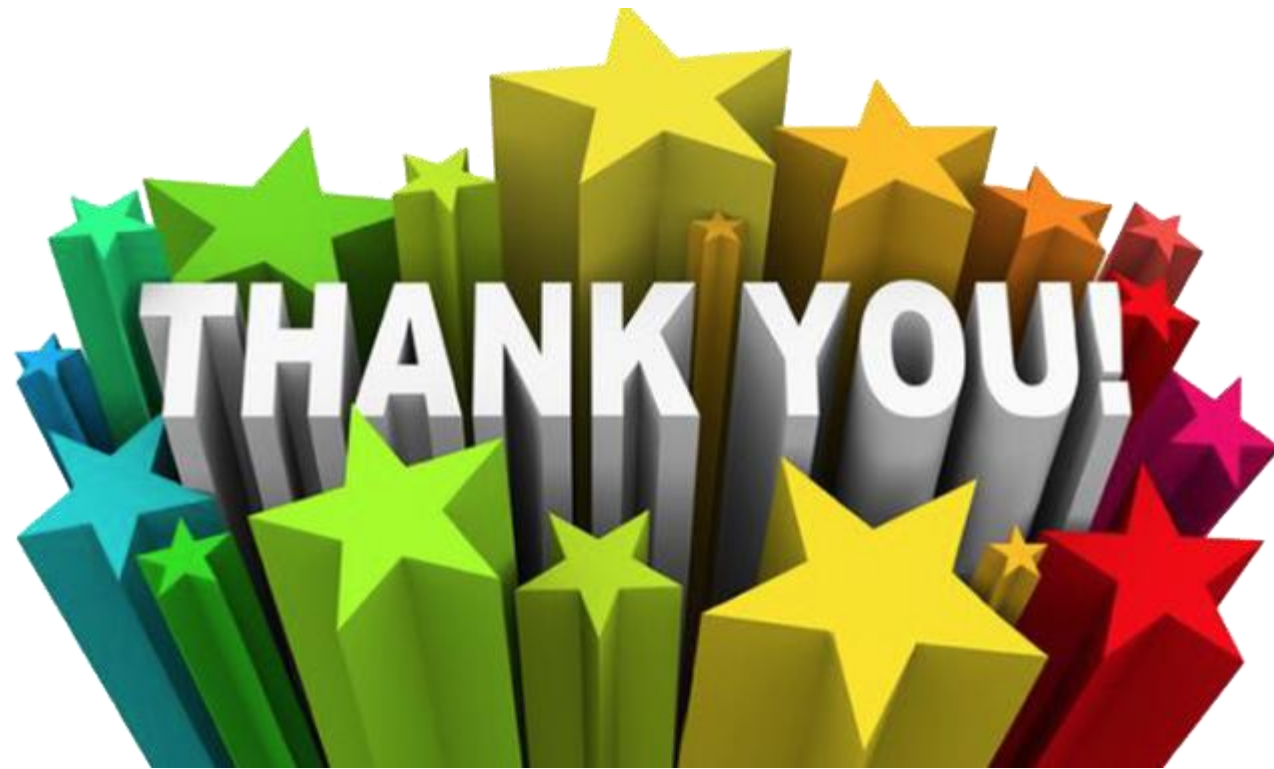

## HPV vaccines

- Safe and effective
- Recommended for all girls and boys ages 11-12
- Requires 3 injections
- **Protect against cervical and many other cancers linked to HPV infection**
- Routine cervical cancer screening is still necessary for women who have been vaccinated

# Why don't parents get their kids vaccinated against HPV?

- Seen as not needed/necessary
- Safety concerns
- They don't know about the HPV vaccines
- Not recommended by the doctor
